# Supplementary material for: Attention capture in birds performing an auditory streaming task
Source: PLoS One. 2020 Jun 26;15(6):e0235420. doi: 10.1371/journal.pone.0235420 (PMC7319309; doi:10.1371/journal.pone.0235420)
Supplement: S1 File — (XLSX) [file pone.0235420.s001.xlsx]

## Sheet: Thresholds in 3 conditions
	Bird Name->	Newton	Wasabi	Davinci	Dollar	Archimedes	Brandi	Zuchinni	MEAN	SEM																													15% RL			Newton	Wasabi	Davinci	Dollar	Archimedes	Brandi		MEAN
No background deviant in baseline condition
TDevPosition	BGDevPosition	8ST																																					TDevPosition	BGDevPosition		8ST	8ST	8ST
6	0	2.34	2.91678	2.34	2.10151	2.1847	2.19271	3.00205	2.43968	0.138369	BASELINE																												6	--						0.36919
9	0	1.26	1.85316	2.02	1.48444	1.96988	1.86883	1.82784	1.75488	0.10494	BASELINE																												9	--						0.427703
12	0	1.1	1.56234	2.5	1.37537	1.96988	1.45725	1.85316	1.68829	0.174478	BASELINE																												12	--						0.483488
Frequency of background deviant is 2% lower than background standard in Condition 1&2
TDevPosition	BGDevPosition	8ST-2%BGdev																																					TDevPosition	BGDevPosition		8ST-2%BGdev	8ST-2%BGdev	8ST-2%BGdev					8ST-2%BGdev
6	2	2.2757	2.1393	2.471	1.93824	1.68395	1.8562	2.1438	2.0726	0.100643	CONDITION 1																												6	2						0.374911	0.46498
6	5	1.8976	2.4242	1.7665	2.02828	1.95483	1.9987	2.32581	2.05656	0.0888489	CONDITION 1																												6	5						0.382249	0.478362
6	8	1.8284	2.6607	2.552	2.79	2.52121	1.99782	2.71658	2.4381	0.141118	CONDITION 1																												6	8						0.37983	0.474257
9	2	1.3759	2.1127	2.2474	1.68665	1.79138	1.39696	2.23216	1.83474	0.140703	CONDITION 1																												9	2						0.420355	0.471406
9	5	1.5368	2.0737	1.8713	1.74871	2.06281	1.62882	1.94816	1.83861	0.0789496	CONDITION 1																												9	5						0.423633	0.431041
9	8	1.5817	2.7645	1.6766	1.50936	2.36576	1.31554	2.25385	1.9239	0.203008	CONDITION 1																												9	8						0.435344	0.44998
12	2	1.13547	2.45071	2.31768	1.41361	2.41889	2.62431	2.90311	2.18054	0.246306	CONDITION 1																												12	2						0.518258	0.400447
12	5	1.1355	2.7458	2.6901	1.73913	1.88027	2.53549	3.12112	2.26392	0.263597	CONDITION 1																												12	5						0.504805	0.373053
12	8	1.3217	2.2812	2.2972	1.50936	2.26885	2.16515	2.10941	1.99327	0.152708	CONDITION 1																												12	8						0.515844	0.417588
6	5	1.88706	2.23923	1.77703	1.73366	2.2508	2.47746	2.7004	2.15223	0.138859	CONDITION 2																												6	8
9	5	2.22856	1.48494	1.54797	1.2134	2.56379	1.82757	1.75048	1.80239	0.174376	CONDITION 2																												9	8
12	5	1.83174	1.55711	1.46019	1.49807	1.98603	2.03117	2.40221	1.82379	0.130327	CONDITION 2																												12	8
Frequency of background deviant is 4% lower than background standard in Condition 1&2
TDevPosition	BGDevPosition	8ST-4%BGdev																																					TDevPosition	BGDevPosition		8ST-4%BGdev	8ST-4%BGdev	8ST-4%BGdev					8ST-4%BGdev
6	2	2.6379	3.0808	2.5732	2.80025	1.74389	1.96989	2.54559	2.47879	0.17617	CONDITION 1																												6	2						0.360478
6	5	2.4387	2.9529	1.8407	2.45752	2.66325	2.09087	3.19809	2.52029	0.177539	CONDITION 1																												6	5						0.368789
6	8	2.2158	3.0656	2.5859	2.48137	2.14199	2.40233	2.70427	2.51389	0.118169	CONDITION 1																												6	8						0.369461
9	2	1.5785	2.8327	2.5005	1.44371	2.79119	1.78751	2.24796	2.16887	0.216245	CONDITION 1																												9	2						0.419527
9	5	2.074	2.1616	1.7408	2.03048	1.53857	1.92296	2.24796	1.95948	0.0936745	CONDITION 1																												9	5						0.444167
9	8	1.463	2.5439	2.1183	2.03048	2.72631	1.94257	2.13954	2.13773	0.155581	CONDITION 1																												9	8						0.443394
12	2	1.07058	2.47691	2.50051	1.39533	2.66325	2.11145	1.97422	2.02746	0.226522	CONDITION 1																												12	2						0.49805
12	5	1.2979	2.4187	2.6405	1.49895	3.66054	2.94398	2.62789	2.44121	0.308978	CONDITION 1																												12	5						0.520941
12	8	1.6386	2.3386	1.976	2.28507	1.63281	1.95102	2.54689	2.05271	0.133092	CONDITION 1																												12	8						0.494978
6	5	2.69016	1.86979	2.04598	2.00008	2.37181	2.55794	2.92117	2.35099	0.148895	CONDITION 2																												6	8
9	5	2.42766	0.864268	2.182	1.76639	2.59517	2.41257	2.21909	2.06674	0.2237	CONDITION 2																												9	8
12	5	1.78805	1.30495	2.07632	2.00008	1.99075	2.1298	1.98435	1.89633	0.106434	CONDITION 2																												12	8
False Alarm %
Baseline		6.82	10.06	6.92	11.98	3.63	15.19	10.06	9.23714	1.43896
condition1 2% background deviant		6.16	7.67	3.95	8.81	5.82	10.59	9.83	7.54714	0.898768
condition1 4% background deviant		6.07	7.61	8.04	11.11	4.28	12.12	12.52	8.82143	1.19593
condition2 2% background deviant		2.81	9.62	10.18	8.68	6.48	11.03	8.2	8.14286	1.0484
condition2 4% background deviant		5.36	6.33	11.36	8.47	6.58	12.8	8.28	8.45429	1.03463
[truncated: 1 more columns]
